# Supplementary material
Source: Springer Nature journal article supplement (https://www.springermedizin.de/resource/supplementary/12955_2006_344_MOESM4_ESM.pdf/9560194)

### Two years

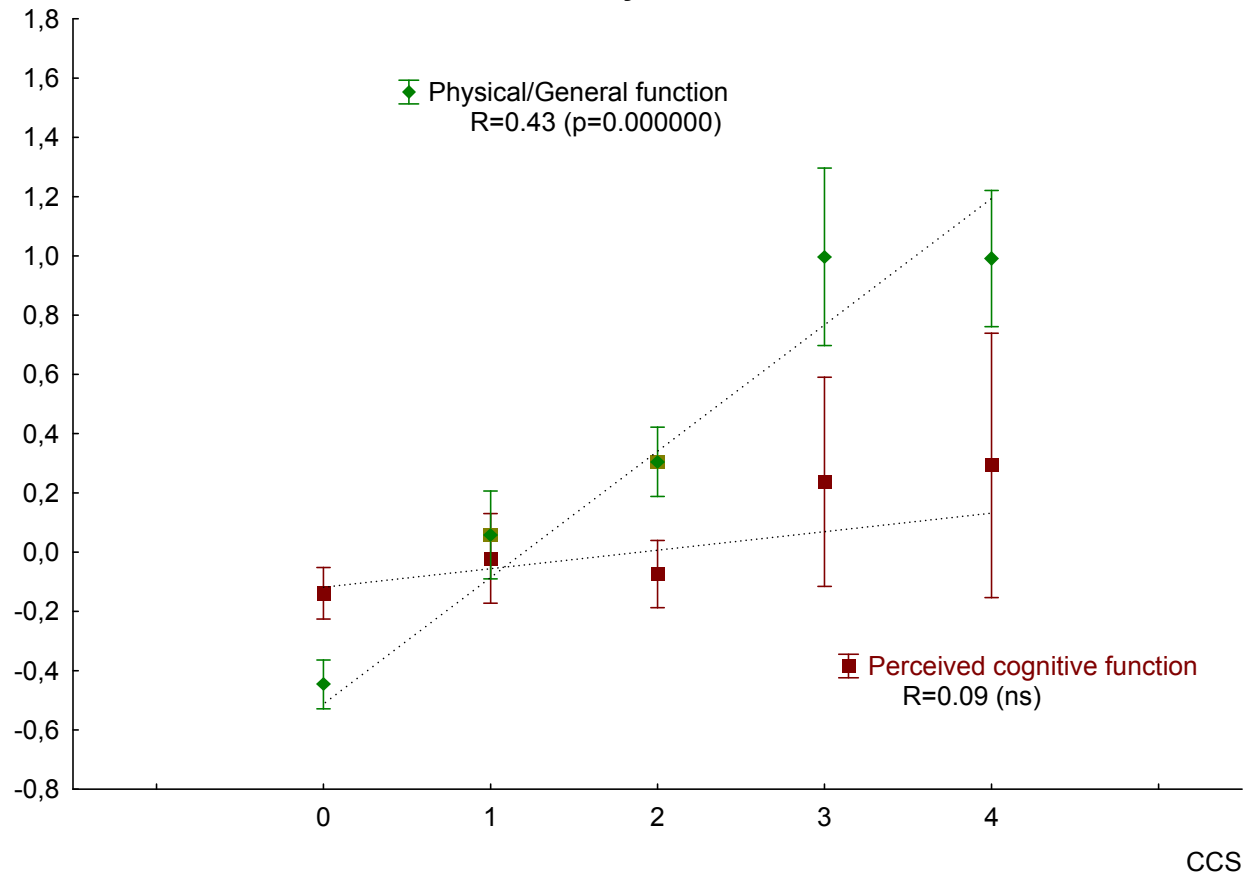

Supplement: MOESM4 [file 9560194]
